# Supplementary material for: Further evidence of Chelonid herpesvirus 5 (ChHV5) latency: high levels of ChHV5 DNA detected in clinically healthy marine turtles
Source: PubMed Central journal article supplement (PMC4974929; doi:10.7717/peerj.2274), 2016-07-27

## Copy number loads of viral Glycoprotein B and endogenous turtle nuclear DNA per individual sample grouped by health status type of tissue-values presented in log10 scale

■ log10 copy number viral gB     
 ■ log10 copy number turtle nuDNA

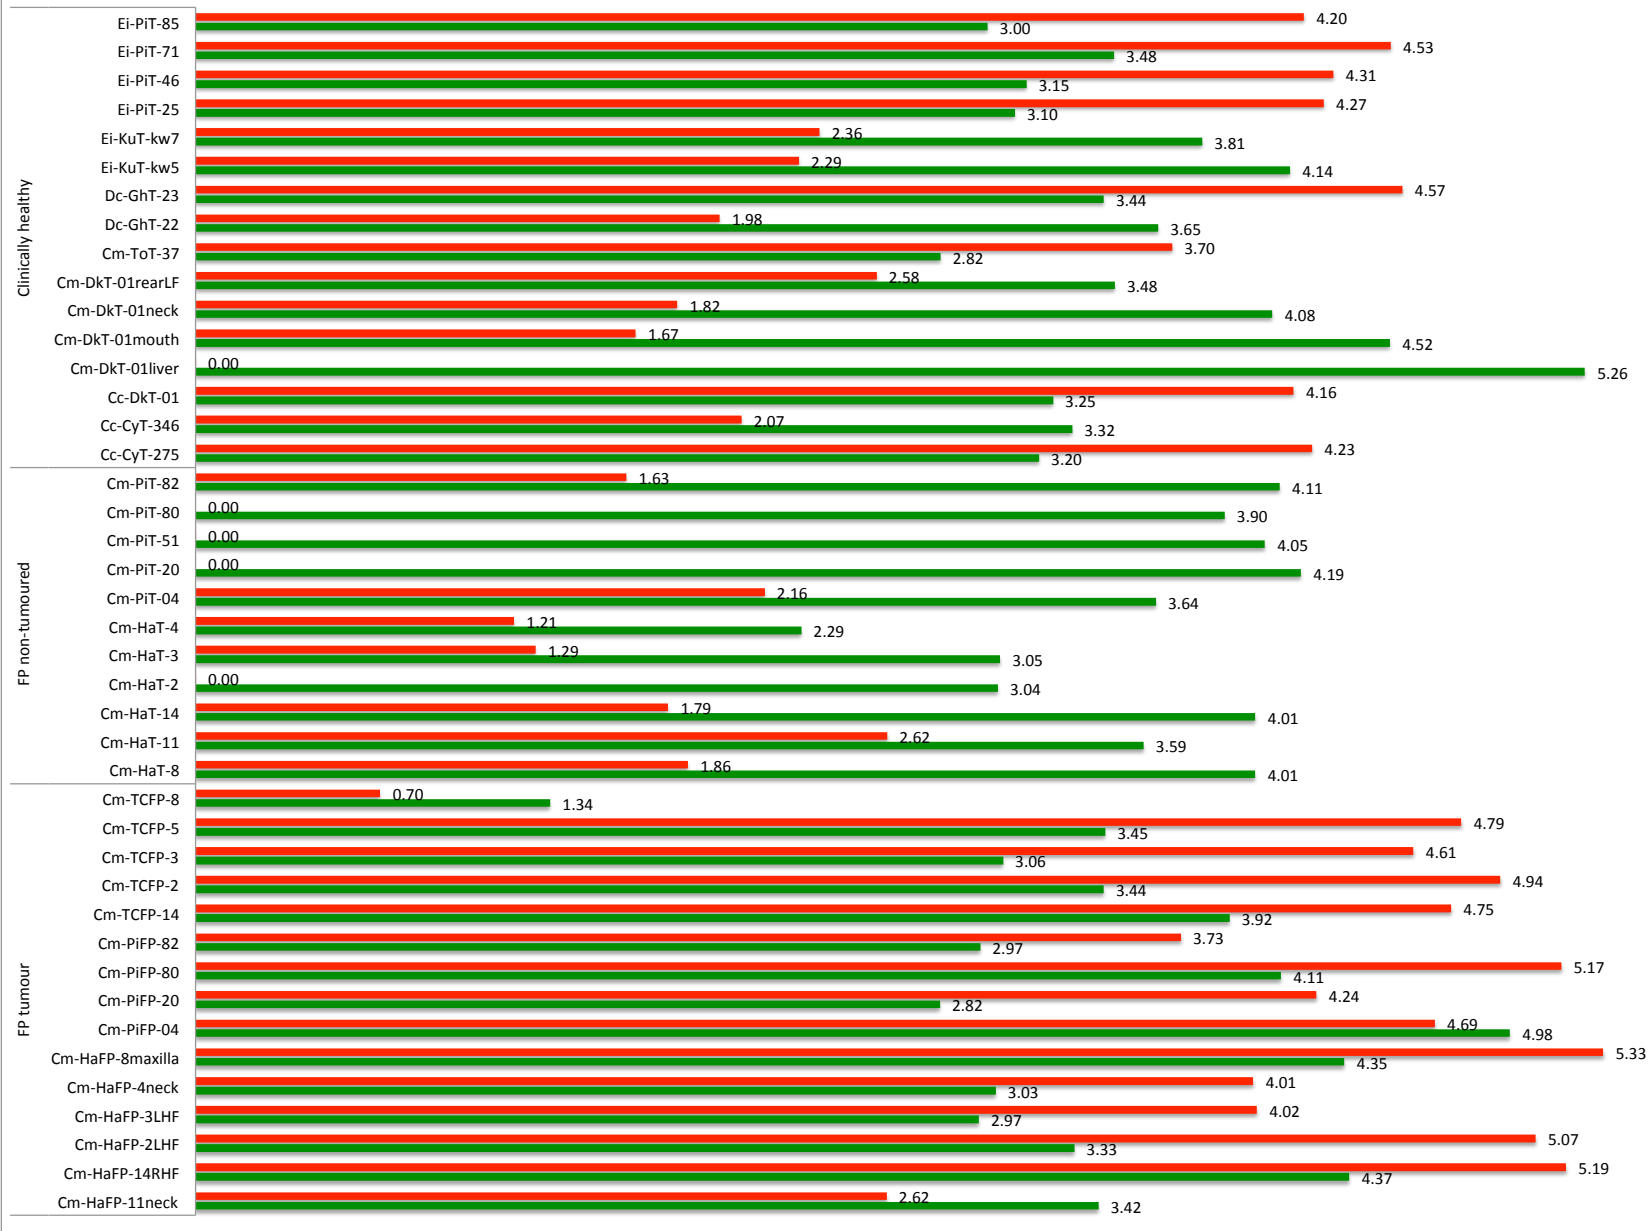

Supplement: peerj-04-2274-s001.pdf [file peerj-04-2274-s001.pdf]
