# Supplementary material for: Further evidence of Chelonid herpesvirus 5 (ChHV5) latency: high levels of ChHV5 DNA detected in clinically healthy marine turtles
Source: PubMed Central journal article supplement (PMC4974929; doi:10.7717/peerj.2274), 2016-07-27
Supplement: peerj-04-2274-s002.pdf [file peerj-04-2274-s002.pdf]

Supplementary Table S2. List of samples analysed Fibropapillomatosis tumoured and non-tumoured green turtles (*Chelonia mydas*) from three confirmed infected populations. Moreover, non-tumoured

samples from four more turtle species are also included for the quality-checking and analysis of qPCR Ct values

| Health Status      | sample ID                     | Species                                     | population (sample origin)                 | C <sub>t</sub> turtle | C <sub>t</sub> virus gene | Delta (Δ) C <sub>t</sub> = | nuDNA copy | CFPHV copy |
|--------------------|-------------------------------|---------------------------------------------|--------------------------------------------|-----------------------|---------------------------|----------------------------|------------|------------|
|                    |                               |                                             |                                            | nuclear DNA           | UL27                      | virus UL27 - nuDNA         | number     | number     |
| FP tumour          | Cm-HaFP-11neck                | <i>Chelonia mydas</i> (green)               | Hawaii, USA, Northern Pacific              | 23,06                 | 22,7                      | -0,36                      | 2,63E+03   | 4,14E+02   |
|                    | Cm-HaFP-14RHF                 | <i>Chelonia mydas</i> (green)               | Hawaii, USA, Northern Pacific              | 20,93                 | 18,25                     | -2,68                      | 2,34E+04   | 1,55E+05   |
|                    | Cm-HaFP-2LHF                  | <i>Chelonia mydas</i> (green)               | Hawaii, USA, Northern Pacific              | 24,12                 | 17,14                     | -6,98                      | 2,13E+04   | 1,19E+05   |
|                    | Cm-HaFP-3LHF                  | <i>Chelonia mydas</i> (green)               | Hawaii, USA, Northern Pacific              | 24,12                 | 20,93                     | -3,19                      | 9,25E+02   | 1,05E+04   |
|                    | Cm-HaFP-4neck                 | <i>Chelonia mydas</i> (green)               | Hawaii, USA, Northern Pacific              | 23,89                 | 20,98                     | -2,91                      | 1,07E+03   | 1,01E+04   |
|                    | Cm-HaFP-8maxilla              | <i>Chelonia mydas</i> (green)               | Hawaii, USA, Northern Pacific              | 20,45                 | 16,81                     | -3,64                      | 2,24E+04   | 2,14E+05   |
|                    | Cm-PiFP-04                    | <i>Chelonia mydas</i> (green)               | Principe Island, Western Africa            | 16,9                  | 18,51                     | 1,61                       | 9,49E+04   | 4,93E+04   |
|                    | Cm-PiFP-20                    | <i>Chelonia mydas</i> (green)               | Principe Island, Western Africa            | 25,95                 | 20,71                     | -5,24                      | 6,59E+02   | 1,76E+04   |
|                    | Cm-PiFP-80                    | <i>Chelonia mydas</i> (green)               | Principe Island, Western Africa            | 20,01                 | 16,79                     | -3,22                      | 1,29E+04   | 1,49E+05   |
|                    | Cm-PiFP-82                    | <i>Chelonia mydas</i> (green)               | Principe Island, Western Africa            | 24,1                  | 24,96                     | 0,86                       | 9,37E+02   | 5,40E+03   |
|                    | Cm-TCFP-14                    | <i>Chelonia mydas</i> (green)               | Turks & Caicos Islands, Caribbean Sea      | 20,8                  | 18,88                     | -1,92                      | 8,24E+03   | 5,68E+04   |
|                    | Cm-TCFP-2                     | <i>Chelonia mydas</i> (green)               | Turks & Caicos Islands, Caribbean Sea      | 22,63                 | 20,62                     | -2,01                      | 2,75E+03   | 8,73E+04   |
|                    | Cm-TCFP-3                     | <i>Chelonia mydas</i> (green)               | Turks & Caicos Islands, Caribbean Sea      | 22,57                 | 21,8                      | -0,77                      | 1,14E+03   | 4,10E+04   |
|                    | Cm-TCFP-5                     | <i>Chelonia mydas</i> (green)               | Turks & Caicos Islands, Caribbean Sea      | 21,18                 | 21,15                     | -0,03                      | 2,79E+03   | 6,21E+04   |
| Cm-TCFP-8          | <i>Chelonia mydas</i> (green) | Turks & Caicos Islands, Caribbean Sea       | 27,75                                      | 26,14                 | -1,61                     | 2,10E+01                   | 4,00E+00   |            |
| non-tumoured FP    | Cm-HaT-8                      | <i>Chelonia mydas</i> (green)               | Hawaii, USA, Northern Pacific              | 21,73                 | 24,01                     | 2,28                       | 1,03E+04   | 7,22E+01   |
|                    | Cm-HaT-11                     | <i>Chelonia mydas</i> (green)               | Hawaii, USA, Northern Pacific              | 20,04                 | 26,8                      | 6,76                       | 3,90E+03   | 4,16E+02   |
|                    | Cm-HaT-14                     | <i>Chelonia mydas</i> (green)               | Hawaii, USA, Northern Pacific              | 20,36                 | 28,96                     | 8,6                        | 1,03E+04   | 6,06E+01   |
|                    | Cm-HaT-2                      | <i>Chelonia mydas</i> (green)               | Hawaii, USA, Northern Pacific              | 25,16                 | 31,39                     | 6,23                       | 1,09E+03   | 4,00E-05   |
|                    | Cm-HaT-3                      | <i>Chelonia mydas</i> (green)               | Hawaii, USA, Northern Pacific              | 23,83                 | 30,82                     | 6,99                       | 1,11E+03   | 1,84E+01   |
|                    | Cm-HaT-4                      | <i>Chelonia mydas</i> (green)               | Hawaii, USA, Northern Pacific              | 26,54                 | 31,13                     | 4,59                       | 1,96E+02   | 1,51E+01   |
|                    | Cm-PiT-04                     | <i>Chelonia mydas</i> (green)               | Principe Island, Western Africa            | 21,71                 | 27,63                     | 5,92                       | 4,34E+03   | 1,42E+02   |
|                    | Cm-PiT-20                     | <i>Chelonia mydas</i> (green)               | Principe Island, Western Africa            | 21,04                 | 27,26                     | 6,22                       | 1,54E+04   | 0,00E+00   |
|                    | Cm-PiT-51                     | <i>Chelonia mydas</i> (green)               | Principe Island, Western Africa            | 21,53                 | 29,2                      | 7,67                       | 1,12E+04   | 4,18E-04   |
|                    | Cm-PiT-80                     | <i>Chelonia mydas</i> (green)               | Principe Island, Western Africa            | 20,64                 | 26,75                     | 6,11                       | 7,91E+03   | 0,00E+00   |
|                    | Cm-PiT-82                     | <i>Chelonia mydas</i> (green)               | Principe Island, Western Africa            | 20,03                 | 29,54                     | 9,51                       | 1,28E+04   | 4,18E+01   |
| Clinically healthy | Cc-CyT-275                    | <i>Caretta caretta</i> (loggerhead)         | Northern Cyprus, Mediterranean             | 23,51                 | 23,18                     | -0,33                      | 1,57E+03   | 1,69E+04   |
|                    | Cc-CyT-346                    | <i>Caretta caretta</i> (loggerhead)         | Northern Cyprus, Mediterranean             | 23,06                 | 26,84                     | 3,78                       | 2,09E+03   | 1,16E+02   |
|                    | Cc-DkT-01                     | <i>Caretta caretta</i> (loggerhead)         | Denmark, Danmarks Aquarium (not naturally) | 23,32                 | 23,43                     | 0,11                       | 1,77E+03   | 1,44E+04   |
|                    | Cc-DkT-02                     | <i>Caretta caretta</i> (loggerhead)         | Denmark, Danmarks Aquarium (not naturally) | 23,53                 | 22,58                     | -0,95                      | 1,77E+03   | 2,48E+04   |
|                    | Cm-DkT-01liver                | <i>Chelonia mydas</i> (green)               | Denmark, Danmarks Aquarium (not naturally) | 17,18                 | 29,83                     | 12,65                      | 1,83E+05   | 2,79E-04   |
|                    | Cm-DkT-01mouth                | <i>Chelonia mydas</i> (green)               | Denmark, Danmarks Aquarium (not naturally) | 18,53                 | 29,41                     | 10,88                      | 3,34E+04   | 4,54E+01   |
|                    | Cm-DkT-01neck                 | <i>Chelonia mydas</i> (green)               | Denmark, Danmarks Aquarium (not naturally) | 20,34                 | 26,93                     | 6,59                       | 1,20E+04   | 6,57E+01   |
|                    | Cm-DkT-01rearLF               | <i>Chelonia mydas</i> (green)               | Denmark, Danmarks Aquarium (not naturally) | 22,48                 | 26,25                     | 3,77                       | 3,03E+03   | 3,79E+02   |
|                    | Cm-ToT-37                     | <i>Chelonia mydas</i> (green)               | Costa Rica, Tortuguero, Caribbean coast    | 24,85                 | 25,08                     | 0,23                       | 6,63E+02   | 5,00E+03   |
|                    | Dc-GhT-22                     | <i>Dermodochelys coriacea</i> (leatherback) | Ghana, Western Africa                      | 21,89                 | 28,02                     | 6,13                       | 4,43E+03   | 9,54E+01   |
|                    | Dc-GhT-23                     | <i>Dermodochelys coriacea</i> (leatherback) | Ghana, Western Africa                      | 22,63                 | 21,95                     | -0,68                      | 2,75E+03   | 3,72E+04   |
|                    | Ei-KuT-kw5                    | <i>Eretmochelys imbricata</i> (hawksbill)   | Qaru Island, Kuwait, Persian Gulf          | 20,1                  | 27,12                     | 7,02                       | 1,39E+04   | 1,92E+02   |
|                    | Ei-KuT-kw7                    | <i>Eretmochelys imbricata</i> (hawksbill)   | Qaru Island, Kuwait, Persian Gulf          | 21,29                 | 26,3                      | 5,01                       | 6,50E+03   | 2,30E+02   |
|                    | Ei-PiT-25                     | <i>Eretmochelys imbricata</i> (hawksbill)   | Principe Island, Western Africa            | 23,84                 | 23,02                     | -0,82                      | 1,27E+03   | 1,87E+04   |
|                    | Ei-PiT-46                     | <i>Eretmochelys imbricata</i> (hawksbill)   | Principe Island, Western Africa            | 23,68                 | 22,89                     | -0,79                      | 1,40E+03   | 2,04E+04   |
|                    | Ei-PiT-71                     | <i>Eretmochelys imbricata</i> (hawksbill)   | Principe Island, Western Africa            | 22,49                 | 22,11                     | -0,38                      | 3,01E+03   | 3,36E+04   |
|                    | Ei-PiT-85                     | <i>Eretmochelys imbricata</i> (hawksbill)   | Principe Island, Western Africa            | 24,21                 | 23,29                     | -0,92                      | 1,00E+03   | 1,58E+04   |
